# Supplementary material for: Arabic translation, adaptation and modification of the dialysis symptom index for chronic kidney disease stages four and five
Source: Springer Nature journal article supplement (doi:10.1186/s12882-015-0036-2), 2015-03-27
Supplement: MOESM1 [file 9741574]

**Additional file 1: Arabic version of CKD-SBI**

**مؤشر عبء الأعراض لمرض الفشل الكلوي المزمن**

**التعليمات**

فيما يلي قائمة بالأعراض التي قد توجد لدى الأشخاص الذين يعانون من مرض الفشل الكلوي المزمن. أقرأ كل واحدة منها بعناية ، إذا كان لديك أي وحده من هذه الأعراض خلال الأسابيع الأربعة الماضية ، يرجى إخبارنا إلى أي درجة أزعجتك أو ضايقتك ، مدى شدتها في العادة و عدد المرات التي تشعر بها و ذلك عن طريق وضع دائرة حول الرقم الملانم.

| إذا نعم:                                                                      |                                                                                 |                                                                                        |             | خلال الأسابيع الأربعة الماضية:<br>هل عانيت من هذا العرض؟ |
|-------------------------------------------------------------------------------|---------------------------------------------------------------------------------|----------------------------------------------------------------------------------------|-------------|----------------------------------------------------------|
| كم مرة يتكرر ذلك على المقياس صفر-١٠؟<br>صفر= أبداً<br>١٠ = تقريباً بشكل مستمر | كيف كانت شدتها في العادة على المقياس صفر-١٠؟<br>صفر= لا يوجد<br>١٠ = شديدة جداً | إلى أي درجة أزعجتك أو ضايقتك على المقياس صفر - ١٠<br>صفر = لا يوجد<br>١٠ = كثيراً جداً |             |                                                          |
| ٠ ١ ٣ ٢ ٤ ٦ ٥ ٧ ٨ ٩ ١٠                                                        | ٠ ١ ٣ ٢ ٤ ٦ ٥ ٧ ٨ ٩ ١٠                                                          | ٠ ١ ٣ ٢ ٤ ٦ ٥ ٧ ٨ ٩ ١٠                                                                 | لا<br>نعم ← | ١- الإمساك                                               |
| ٠ ١ ٣ ٢ ٤ ٦ ٥ ٧ ٨ ٩ ١٠                                                        | ٠ ١ ٣ ٢ ٤ ٦ ٥ ٧ ٨ ٩ ١٠                                                          | ٠ ١ ٣ ٢ ٤ ٦ ٥ ٧ ٨ ٩ ١٠                                                                 | لا<br>نعم ← | ٢- الغثيان                                               |
| ٠ ١ ٣ ٢ ٤ ٦ ٥ ٧ ٨ ٩ ١٠                                                        | ٠ ١ ٣ ٢ ٤ ٦ ٥ ٧ ٨ ٩ ١٠                                                          | ٠ ١ ٣ ٢ ٤ ٦ ٥ ٧ ٨ ٩ ١٠                                                                 | لا<br>نعم ← | ٣- الاستفراغ                                             |
| ٠ ١ ٣ ٢ ٤ ٦ ٥ ٧ ٨ ٩ ١٠                                                        | ٠ ١ ٣ ٢ ٤ ٦ ٥ ٧ ٨ ٩ ١٠                                                          | ٠ ١ ٣ ٢ ٤ ٦ ٥ ٧ ٨ ٩ ١٠                                                                 | لا<br>نعم ← | ٤- الاسهال                                               |
| ٠ ١ ٣ ٢ ٤ ٦ ٥ ٧ ٨ ٩ ١٠                                                        | ٠ ١ ٣ ٢ ٤ ٦ ٥ ٧ ٨ ٩ ١٠                                                          | ٠ ١ ٣ ٢ ٤ ٦ ٥ ٧ ٨ ٩ ١٠                                                                 | لا<br>نعم ← | ٥- فقدان الشهية                                          |

| إذا نعم:                                                                    |                                                                                |                                                                                    |             | خلال الأسابيع الأربعة الماضية:<br>هل عانيت من هذا العرض؟           |
|-----------------------------------------------------------------------------|--------------------------------------------------------------------------------|------------------------------------------------------------------------------------|-------------|--------------------------------------------------------------------|
| كم مرة يتكرر ذلك على المقياس صفر-١٠؟<br>صفر= أبداً<br>١٠= تقريبا بشكل مستمر | كيف كانت شدتها في العادة على المقياس صفر-١٠؟<br>صفر= لا يوجد<br>١٠= شديدة جداً | الى أي درجة أزعجتك أو ضايقتك على المقياس صفر-١٠<br>صفر= لا يوجد<br>١٠= كثيراً جداً |             |                                                                    |
| ٠ ١ ٣ ٢ ٤ ٦ ٥ ٧ ٨ ٩ ١٠                                                      | ٠ ١ ٣ ٢ ٤ ٦ ٥ ٧ ٨ ٩ ١٠                                                         | ٠ ١ ٣ ٢ ٤ ٦ ٥ ٧ ٨ ٩ ١٠                                                             | لا<br>نعم ← | ٦- شد عضلي                                                         |
| ٠ ١ ٣ ٢ ٤ ٦ ٥ ٧ ٨ ٩ ١٠                                                      | ٠ ١ ٣ ٢ ٤ ٦ ٥ ٧ ٨ ٩ ١٠                                                         | ٠ ١ ٣ ٢ ٤ ٦ ٥ ٧ ٨ ٩ ١٠                                                             | لا<br>نعم ← | ٧- تورم في الساقين                                                 |
| ٠ ١ ٣ ٢ ٤ ٦ ٥ ٧ ٨ ٩ ١٠                                                      | ٠ ١ ٣ ٢ ٤ ٦ ٥ ٧ ٨ ٩ ١٠                                                         | ٠ ١ ٣ ٢ ٤ ٦ ٥ ٧ ٨ ٩ ١٠                                                             | لا<br>نعم ← | ٨- قصر النفس                                                       |
| ٠ ١ ٣ ٢ ٤ ٦ ٥ ٧ ٨ ٩ ١٠                                                      | ٠ ١ ٣ ٢ ٤ ٦ ٥ ٧ ٨ ٩ ١٠                                                         | ٠ ١ ٣ ٢ ٤ ٦ ٥ ٧ ٨ ٩ ١٠                                                             | لا<br>نعم ← | ٩- الدوار أو الدوخة                                                |
| ٠ ١ ٣ ٢ ٤ ٦ ٥ ٧ ٨ ٩ ١٠                                                      | ٠ ١ ٣ ٢ ٤ ٦ ٥ ٧ ٨ ٩ ١٠                                                         | ٠ ١ ٣ ٢ ٤ ٦ ٥ ٧ ٨ ٩ ١٠                                                             | لا<br>نعم ← | ١٠- عدم ثبات الساقين ،<br>صعوبة المحافظة على سكون<br>وثبات الساقين |
| ٠ ١ ٣ ٢ ٤ ٦ ٥ ٧ ٨ ٩ ١٠                                                      | ٠ ١ ٣ ٢ ٤ ٦ ٥ ٧ ٨ ٩ ١٠                                                         | ٠ ١ ٣ ٢ ٤ ٦ ٥ ٧ ٨ ٩ ١٠                                                             | لا<br>نعم ← | ١١- تنميل أو وخز خفيف في<br>القدمين                                |
| ٠ ١ ٣ ٢ ٤ ٦ ٥ ٧ ٨ ٩ ١٠                                                      | ٠ ١ ٣ ٢ ٤ ٦ ٥ ٧ ٨ ٩ ١٠                                                         | ٠ ١ ٣ ٢ ٤ ٦ ٥ ٧ ٨ ٩ ١٠                                                             | لا<br>نعم ← | ١٢- الشعور بالتعب أو فقدان<br>الطاقة                               |
| ٠ ١ ٣ ٢ ٤ ٦ ٥ ٧ ٨ ٩ ١٠                                                      | ٠ ١ ٣ ٢ ٤ ٦ ٥ ٧ ٨ ٩ ١٠                                                         | ٠ ١ ٣ ٢ ٤ ٦ ٥ ٧ ٨ ٩ ١٠                                                             | لا<br>نعم ← | ١٣- الكحة (السعال)                                                 |

| إذا نعم:                                                                    |                                                                                |                                                                                        |             | خلال الأسابيع الأربعة الماضية:<br>هل عانيت من هذا العرض؟ |
|-----------------------------------------------------------------------------|--------------------------------------------------------------------------------|----------------------------------------------------------------------------------------|-------------|----------------------------------------------------------|
| كم مرة يتكرر ذلك على المقياس صفر-١٠؟<br>صفر= أبداً<br>١٠= تقريبا بشكل مستمر | كيف كانت شدتها في العادة على المقياس صفر-١٠؟<br>صفر= لا يوجد<br>١٠= شديدة جداً | الى أي درجة أزعجتك أو ضايقتك على المقياس صفر- ١٠.<br>صفر = لا يوجد<br>١٠ = كثيراً جداً |             |                                                          |
| ٠ ١ ٣ ٢ ٤ ٦ ٥ ٧ ٨ ٩ ١٠                                                      | ٠ ١ ٣ ٢ ٤ ٦ ٥ ٧ ٨ ٩ ١٠                                                         | ٠ ١ ٣ ٢ ٤ ٦ ٥ ٧ ٨ ٩ ١٠                                                                 | لا<br>نعم ← | ١٤- جفاف الفم                                            |
| ٠ ١ ٣ ٢ ٤ ٦ ٥ ٧ ٨ ٩ ١٠                                                      | ٠ ١ ٣ ٢ ٤ ٦ ٥ ٧ ٨ ٩ ١٠                                                         | ٠ ١ ٣ ٢ ٤ ٦ ٥ ٧ ٨ ٩ ١٠                                                                 | لا<br>نعم ← | ١٥- ألم العظام أو المفاصل                                |
| ٠ ١ ٣ ٢ ٤ ٦ ٥ ٧ ٨ ٩ ١٠                                                      | ٠ ١ ٣ ٢ ٤ ٦ ٥ ٧ ٨ ٩ ١٠                                                         | ٠ ١ ٣ ٢ ٤ ٦ ٥ ٧ ٨ ٩ ١٠                                                                 | لا<br>نعم ← | ١٦- ألم في الصدر                                         |
| ٠ ١ ٣ ٢ ٤ ٦ ٥ ٧ ٨ ٩ ١٠                                                      | ٠ ١ ٣ ٢ ٤ ٦ ٥ ٧ ٨ ٩ ١٠                                                         | ٠ ١ ٣ ٢ ٤ ٦ ٥ ٧ ٨ ٩ ١٠                                                                 | لا<br>نعم ← | ١٧- الصداع                                               |
| ٠ ١ ٣ ٢ ٤ ٦ ٥ ٧ ٨ ٩ ١٠                                                      | ٠ ١ ٣ ٢ ٤ ٦ ٥ ٧ ٨ ٩ ١٠                                                         | ٠ ١ ٣ ٢ ٤ ٦ ٥ ٧ ٨ ٩ ١٠                                                                 | لا<br>نعم ← | ١٨- وجع العضلات                                          |
| ٠ ١ ٣ ٢ ٤ ٦ ٥ ٧ ٨ ٩ ١٠                                                      | ٠ ١ ٣ ٢ ٤ ٦ ٥ ٧ ٨ ٩ ١٠                                                         | ٠ ١ ٣ ٢ ٤ ٦ ٥ ٧ ٨ ٩ ١٠                                                                 | لا<br>نعم ← | ١٩- الصعوبة في التركيز                                   |
| ٠ ١ ٣ ٢ ٤ ٦ ٥ ٧ ٨ ٩ ١٠                                                      | ٠ ١ ٣ ٢ ٤ ٦ ٥ ٧ ٨ ٩ ١٠                                                         | ٠ ١ ٣ ٢ ٤ ٦ ٥ ٧ ٨ ٩ ١٠                                                                 | لا<br>نعم ← | ٢٠- جفاف الجلد                                           |
| ٠ ١ ٣ ٢ ٤ ٦ ٥ ٧ ٨ ٩ ١٠                                                      | ٠ ١ ٣ ٢ ٤ ٦ ٥ ٧ ٨ ٩ ١٠                                                         | ٠ ١ ٣ ٢ ٤ ٦ ٥ ٧ ٨ ٩ ١٠                                                                 | لا<br>نعم ← | ٢١- الحكّة                                               |

| إذا نعم:                                                                    |                                                                                   |                                                                                          |             | خلال الأسابيع الأربعة<br>الماضية:<br>هل عانيت من هذا<br>العرض؟ |
|-----------------------------------------------------------------------------|-----------------------------------------------------------------------------------|------------------------------------------------------------------------------------------|-------------|----------------------------------------------------------------|
| كم مرة يتكرر ذلك على المقياس صفر-١٠؟<br>صفر= أبداً<br>١٠= تقريبا بشكل مستمر | كيف كانت شدتها في العادة على المقياس<br>صفر-١٠؟<br>صفر= لا يوجد<br>١٠= شديدة جداً | الى أي درجة أزعجتك أو ضايقتك على المقياس<br>صفر- ١٠<br>صفر = لا يوجد<br>١٠ = كثيراً جداً |             |                                                                |
| ٠ ١ ٣ ٢ ٤ ٦ ٥ ٧ ٨ ٩ ١٠                                                      | ٠ ١ ٣ ٢ ٤ ٦ ٥ ٧ ٨ ٩ ١٠                                                            | ٠ ١ ٣ ٢ ٤ ٦ ٥ ٧ ٨ ٩ ١٠                                                                   | لا<br>نعم ← | ٢٢- القلق                                                      |
| ٠ ١ ٣ ٢ ٤ ٦ ٥ ٧ ٨ ٩ ١٠                                                      | ٠ ١ ٣ ٢ ٤ ٦ ٥ ٧ ٨ ٩ ١٠                                                            | ٠ ١ ٣ ٢ ٤ ٦ ٥ ٧ ٨ ٩ ١٠                                                                   | لا<br>نعم ← | ٢٣- الشعور بالتوتر                                             |
| ٠ ١ ٣ ٢ ٤ ٦ ٥ ٧ ٨ ٩ ١٠                                                      | ٠ ١ ٣ ٢ ٤ ٦ ٥ ٧ ٨ ٩ ١٠                                                            | ٠ ١ ٣ ٢ ٤ ٦ ٥ ٧ ٨ ٩ ١٠                                                                   | لا<br>نعم ← | ٢٤- صعوبة في النوم                                             |
| ٠ ١ ٣ ٢ ٤ ٦ ٥ ٧ ٨ ٩ ١٠                                                      | ٠ ١ ٣ ٢ ٤ ٦ ٥ ٧ ٨ ٩ ١٠                                                            | ٠ ١ ٣ ٢ ٤ ٦ ٥ ٧ ٨ ٩ ١٠                                                                   | لا<br>نعم ← | ٢٥- صعوبة في البقاء نائماً"                                    |
| ٠ ١ ٣ ٢ ٤ ٦ ٥ ٧ ٨ ٩ ١٠                                                      | ٠ ١ ٣ ٢ ٤ ٦ ٥ ٧ ٨ ٩ ١٠                                                            | ٠ ١ ٣ ٢ ٤ ٦ ٥ ٧ ٨ ٩ ١٠                                                                   | لا<br>نعم ← | ٢٦- الشعور بسرعة الانفعال<br>و الغضب                           |
| ٠ ١ ٣ ٢ ٤ ٦ ٥ ٧ ٨ ٩ ١٠                                                      | ٠ ١ ٣ ٢ ٤ ٦ ٥ ٧ ٨ ٩ ١٠                                                            | ٠ ١ ٣ ٢ ٤ ٦ ٥ ٧ ٨ ٩ ١٠                                                                   | لا<br>نعم ← | ٢٧- الشعور بالحزن                                              |
| ٠ ١ ٣ ٢ ٤ ٦ ٥ ٧ ٨ ٩ ١٠                                                      | ٠ ١ ٣ ٢ ٤ ٦ ٥ ٧ ٨ ٩ ١٠                                                            | ٠ ١ ٣ ٢ ٤ ٦ ٥ ٧ ٨ ٩ ١٠                                                                   | لا<br>نعم ← | ٢٨- الشعور بالاضطراب<br>وعدم راحة البال                        |
| ٠ ١ ٣ ٢ ٤ ٦ ٥ ٧ ٨ ٩ ١٠                                                      | ٠ ١ ٣ ٢ ٤ ٦ ٥ ٧ ٨ ٩ ١٠                                                            | ٠ ١ ٣ ٢ ٤ ٦ ٥ ٧ ٨ ٩ ١٠                                                                   | لا<br>نعم ← | ٢٩- الاكتئاب                                                   |

| إذا نعم:                                                                        |                                                                                 |                                                                                       |             | خلال الأسابيع الأربعة الماضية:<br>هل عانيت من هذا العرض؟ |
|---------------------------------------------------------------------------------|---------------------------------------------------------------------------------|---------------------------------------------------------------------------------------|-------------|----------------------------------------------------------|
| كم مرة يتكرر ذلك على المقياس صفر-١٠؟<br>صفر= أبدأ<br>١٠ = تقريباً بشكل مستمر    | كيف كانت شدتها في العادة على المقياس صفر-١٠؟<br>صفر= لا يوجد<br>١٠ = شديدة جداً | الى أي درجة أزعجتك أو ضايقتك على المقياس صفر- ١٠<br>صفر = لا يوجد<br>١٠ = كثيراً جداً |             |                                                          |
| ٠ ١ ٣ ٢ ٤ ٦ ٥ ٧ ٨ ٩ ١٠                                                          | ٠ ١ ٣ ٢ ٤ ٦ ٥ ٧ ٨ ٩ ١٠                                                          | ٠ ١ ٣ ٢ ٤ ٦ ٥ ٧ ٨ ٩ ١٠                                                                | لا<br>نعم ← | ٣٠- نقص الرغبة الجنسية                                   |
| ٠ ١ ٣ ٢ ٤ ٦ ٥ ٧ ٨ ٩ ١٠                                                          | ٠ ١ ٣ ٢ ٤ ٦ ٥ ٧ ٨ ٩ ١٠                                                          | ٠ ١ ٣ ٢ ٤ ٦ ٥ ٧ ٨ ٩ ١٠                                                                | لا<br>نعم ← | ٣١- صعوبة في الإثارة الجنسية                             |
| ٠ ١ ٣ ٢ ٤ ٦ ٥ ٧ ٨ ٩ ١٠                                                          | ٠ ١ ٣ ٢ ٤ ٦ ٥ ٧ ٨ ٩ ١٠                                                          | ٠ ١ ٣ ٢ ٤ ٦ ٥ ٧ ٨ ٩ ١٠                                                                | لا<br>نعم ← | ٣٢ - كثره تكرار التبول في الليل (أثناء النوم)            |
| إذا كان لديك أي أعراض أخرى خلال الأسابيع الأربعة الماضية, من فضلك اذكرها أدناه: |                                                                                 |                                                                                       |             |                                                          |
| ٠ ١ ٣ ٢ ٤ ٦ ٥ ٧ ٨ ٩ ١٠                                                          | ٠ ١ ٣ ٢ ٤ ٦ ٥ ٧ ٨ ٩ ١٠                                                          | ٠ ١ ٣ ٢ ٤ ٦ ٥ ٧ ٨ ٩ ١٠                                                                | لا<br>نعم ← | أخرى:                                                    |
| ٠ ١ ٣ ٢ ٤ ٦ ٥ ٧ ٨ ٩ ١٠                                                          | ٠ ١ ٣ ٢ ٤ ٦ ٥ ٧ ٨ ٩ ١٠                                                          | ٠ ١ ٣ ٢ ٤ ٦ ٥ ٧ ٨ ٩ ١٠                                                                | لا<br>نعم ← | أخرى:                                                    |
| ٠ ١ ٣ ٢ ٤ ٦ ٥ ٧ ٨ ٩ ١٠                                                          | ٠ ١ ٣ ٢ ٤ ٦ ٥ ٧ ٨ ٩ ١٠                                                          | ٠ ١ ٣ ٢ ٤ ٦ ٥ ٧ ٨ ٩ ١٠                                                                | لا<br>نعم ← | أخرى:                                                    |

شكراً لمشاركتك في اكمال هذا الإستبيان
